# Supplementary material for: Development and validation of the acculturation discrepancy scale for youth of Korean descent in Japan (ADS-KJ)
Source: BMC Psychol. 2026 Apr 9;14:495. doi: 10.1186/s40359-026-03998-5 (PMC13067504; doi:10.1186/s40359-026-03998-5)
Supplement: Supplementary file 1 — Supplementary Material 1 [file 40359_2026_3998_MOESM1_ESM.xlsx]

## Sheet: Appendix 2
Appendix 2 The Items of Acculturation Discrepancy Scale for Youth of Korean Descent in Japan-Japanese version
以下の項目について，当てはまる数字を選んでください。 あまり深く考え込まず，普段感じている状態に近い数字を選んでください。	全く当てはまらない	時々当てはまらない	どちらでもない	時々当てはまる	とてもよく当てはまる
スポーツ観戦でどの国を応援するかについて，親との間に考え方のギャップを感じる。	1	2	3	4	5
どの国の政治に関心があるかについて，親との間に考え方のギャップを感じる。	1	2	3	4	5
民族名と通名のどちらを使用したいかについて，親との間に考え方のギャップを感じる。	1	2	3	4	5
どのルーツの人と結婚したいかについて，親との間に考え方のギャップを感じる。	1	2	3	4	5
どのルーツの友人が多いかについて，親との間に考え方のギャップを感じる。	1	2	3	4	5
自身の国籍を誇りに思っているかについて，親との間に考え方のギャップを感じる。	1	2	3	4	5
日常的に使用する言語について，親との間に考え方のギャップを感じる。	1	2	3	4	5
どの国にアイデンティティを感じているかについて，親との間に考え方のギャップを感じる。	1	2	3	4	5
どの国の伝統文化を好むかについて，親との間に考え方のギャップを感じる。	1	2	3	4	5
どの国の食事を好むかについて，親との間に考え方のギャップを感じる。	1	2	3	4	5
どの国の歴史に関心があるかについて，親との間に考え方のギャップを感じる。	1	2	3	4	5
「親は，子どもの結婚や恋愛に口出しするものである。」という考えについて，親との間にギャップを感じる。	1	2	3	4	5
「子どもが結婚した後も，子どもは親と同居することが望ましい。」という考えについて，親との間にギャップを感じる。	1	2	3	4	5
「親は，子どもの就職や進学に口出しするものである。」という考えについて，親との間にギャップを感じる。	1	2	3	4	5
「子どもは，親孝行をするのが普通である。」という考えについて，親との間にギャップを感じる。	1	2	3	4	5
「父親は，家族の中で最も敬われるべき存在である。」という考えについて，親との間にギャップを感じる。	1	2	3	4	5
「男性は，社会で活躍しなければならない。」という考えについて，親との間にギャップを感じる。	1	2	3	4	5
「家事は，女性が行うものである。」という考えについて，親との間にギャップを感じる。	1	2	3	4	5
「生まれながらに持つ性別と自覚している性別が異なることは，あってはならないと思う。」という考えについて，親との間にギャップを感じる。	1	2	3	4	5
「子どもは，偏差値の高い学校に進学するべきである。」という考えについて，親との間にギャップを感じる。	1	2	3	4	5
「子どもは，有名企業に就職するべきである。」という考えについて，親との間にギャップを感じる。	1	2	3	4	5
