# Supplementary material for: Development and validation of the acculturation discrepancy scale for youth of Korean descent in Japan (ADS-KJ)
Source: BMC Psychol. 2026 Apr 9;14:495. doi: 10.1186/s40359-026-03998-5 (PMC13067504; doi:10.1186/s40359-026-03998-5)
Supplement: Supplementary file 2 — Supplementary Material 2 [file 40359_2026_3998_MOESM2_ESM.xlsx]

## Sheet: Appendix 1
Appendix 1 The Items of Acculturation Discrepancy Scale for Youth of Korean Descent in Japan
For each of the following items, please select the number that best describes your usual feelings. Please respond by choosing the number that most closely represents your typical state, without thinking too deeply.	Strongly disagree	Disagree	Neutral	Agree	Strongly agree
I perceive differences with my parents regarding which country they support in sports.	1	2	3	4	5
I perceive differences with my parents regarding which country's politics they are interested in.	1	2	3	4	5
I perceive differences with my parents regarding whether I should use an ethnic name or a commonly used name.	1	2	3	4	5
I perceive differences with my parents regarding the ethnic background of the person they would prefer me to marry.	1	2	3	4	5
I perceive differences with my parents regarding the ethnic background of their close friends.	1	2	3	4	5
I perceive differences with my parents regarding how much pride they feel in their nationality.	1	2	3	4	5
I perceive differences with my parents regarding which language they use in daily life.	1	2	3	4	5
I perceive differences with my parents regarding which national identity they relate to.	1	2	3	4	5
I perceive differences with my parents regarding which traditional culture they prefer.	1	2	3	4	5
I perceive differences with my parents regarding which country's food they prefer.	1	2	3	4	5
I perceive differences with my parents regarding which country's history they are interested in.	1	2	3	4	5
I perceive differences with my parents regarding the belief that "parents should intervene in their children's romance or marriage."	1	2	3	4	5
I perceive differences with my parents regarding the belief that "children should live with their parents even after marriage."	1	2	3	4	5
I perceive differences with my parents regarding the belief that "parents should intervene in children's employment and education."	1	2	3	4	5
I perceive differences with my parents regarding the belief that "children should be filial to their parents."	1	2	3	4	5
I perceive differences with my parents regarding the belief that "fathers should be the most respected in the family."	1	2	3	4	5
I perceive differences with my parents regarding the belief that "men must be active in society."	1	2	3	4	5
I perceive differences with my parents regarding the belief that "housework is for women."	1	2	3	4	5
I perceive differences with my parents regarding the belief that "a mismatch between assigned and identified gender should not exist."	1	2	3	4	5
I perceive differences with my parents regarding the belief that "children should attend high-ranking schools."	1	2	3	4	5
I perceive differences with my parents regarding the belief that "children should work for prestigious companies."	1	2	3	4	5
